# Supplementary material for: QFR Predicts the Incidence of Long-Term Adverse Events in Patients with Suspected CAD: Feasibility and Reproducibility of the Method
Source: MDPI journal article supplement (doi:10.3390/jcm9010220), 2020-01-14
Supplement: s1 [file s1]

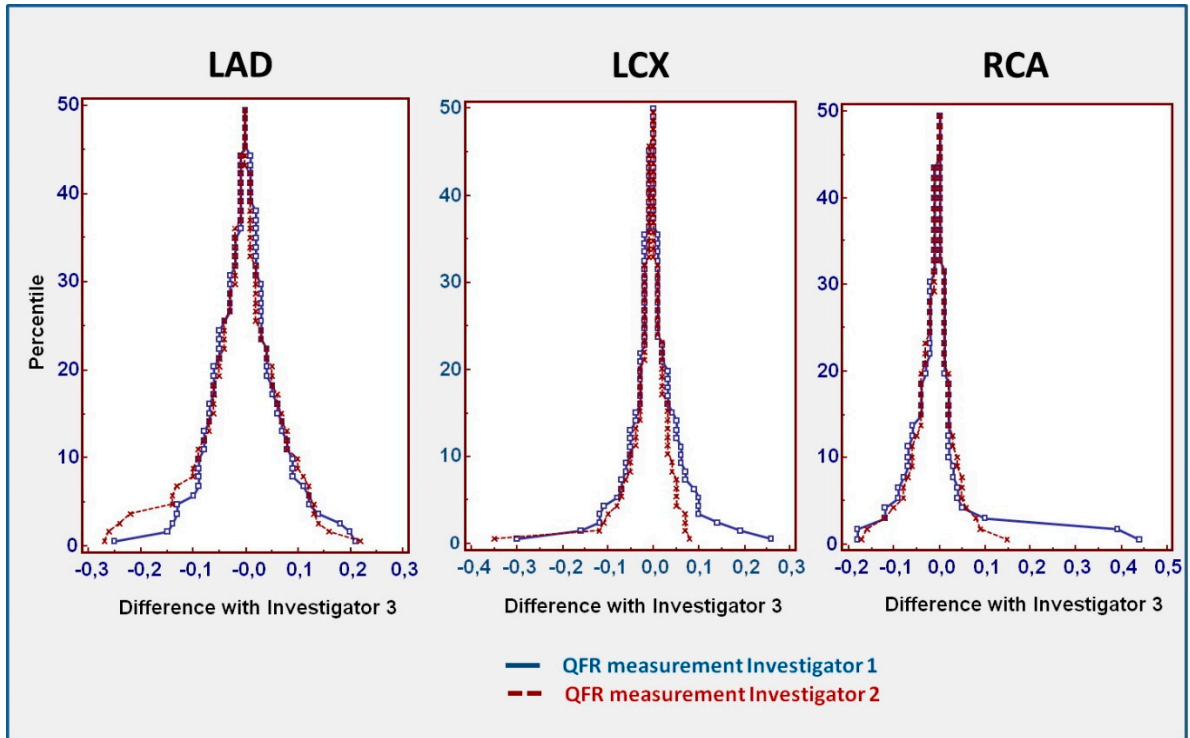

Supplemental Figure S1. Mountain Plots of QFR reproducibility.

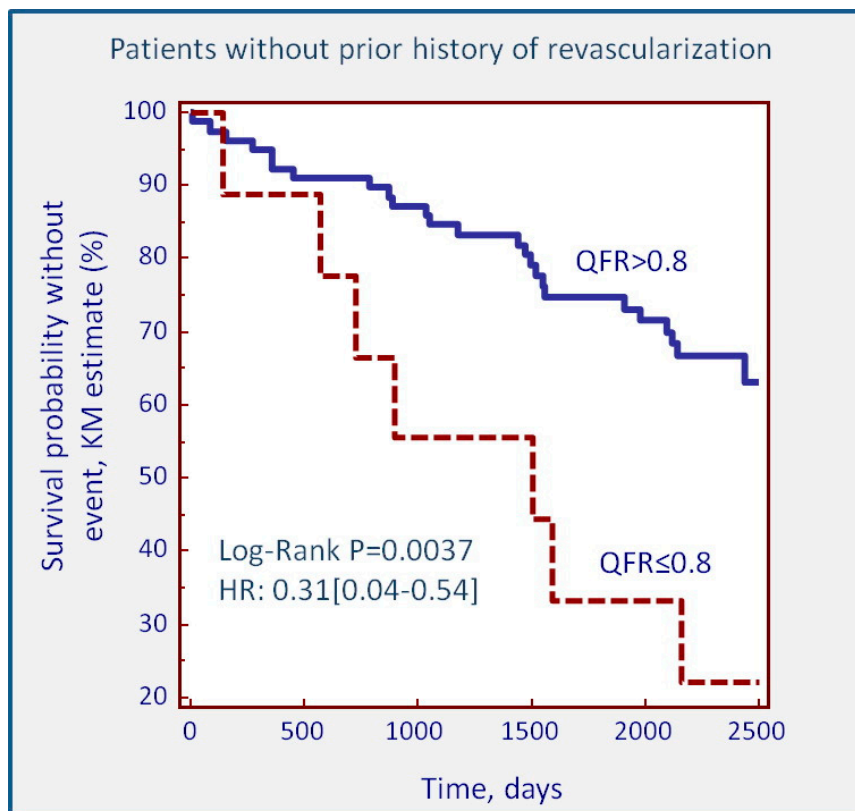

Supplemental Figure S2. QFR Kaplan-Meier event-free survival curves of patients without a prior history of revascularization.

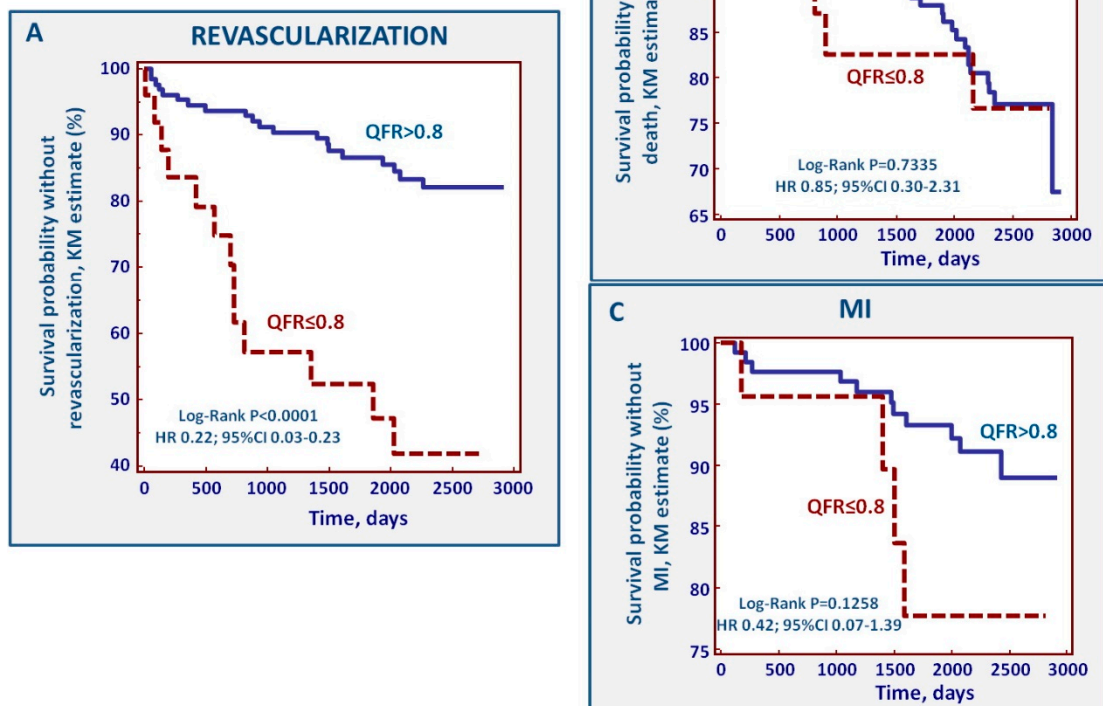

Supplemental Figure S3. Kaplan-Meier curves describing event-free survival of QFR≤0.80 concerning individual endpoints.

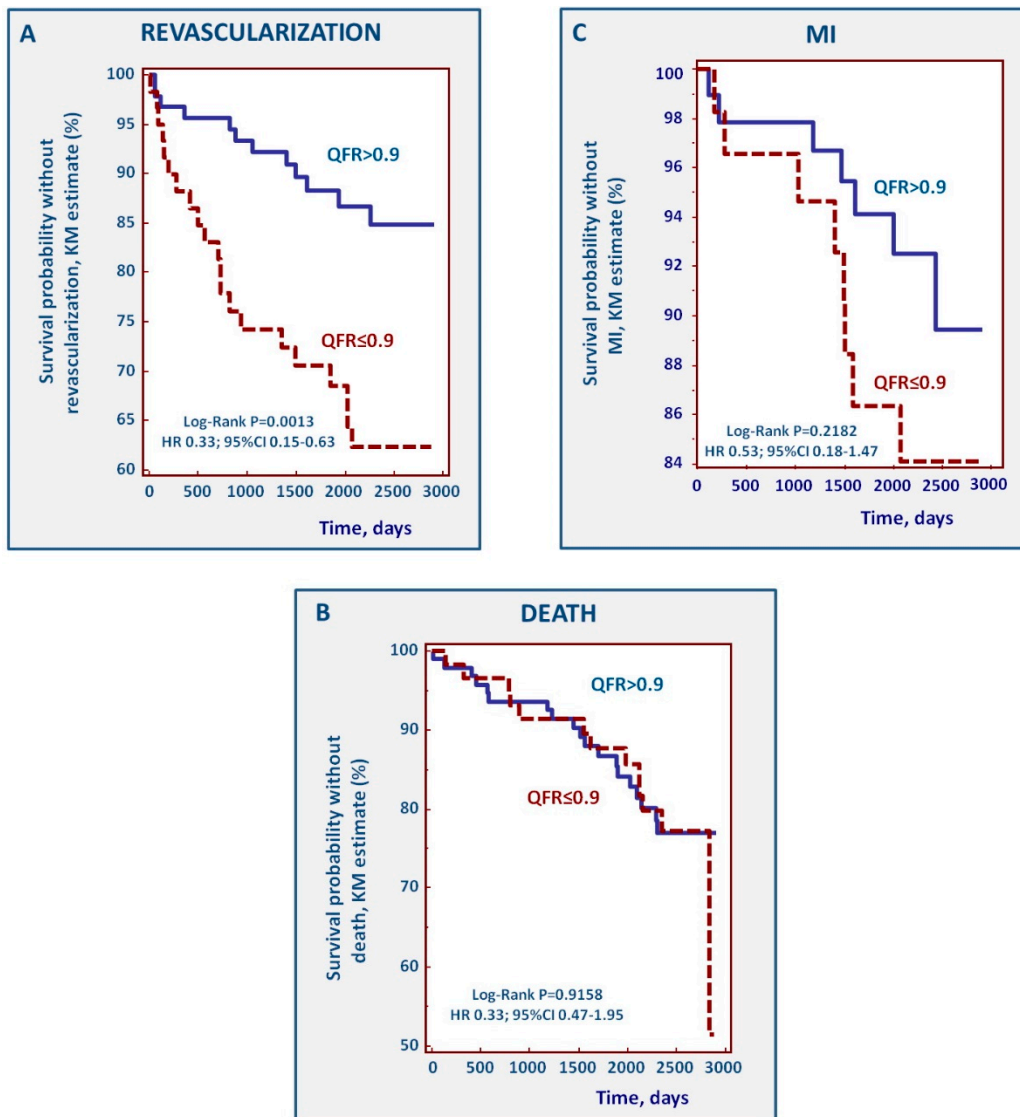

Supplemental Figure S4. Kaplan-Meier curves describing event-free survival of QFR≤0.90 concerning individual endpoints.
